# Supplementary material for: Prototropic forms of hydroxy derivatives of naphthoic acid within deep eutectic solvents
Source: Royal Society of Chemistry journal article supplement (doi:10.1039/d1cp00845e), 2021-01-01
Supplement: d1cp00845e1.pdf [file d1cp00845e1.pdf]

## **Electronic Supplementary Information**

### **Prototropic forms of hydroxy derivatives of naphthoic acid within deep eutectic solvents**

Vaishali Khokhar and Siddharth Pandey\*

Department of Chemistry, Indian Institute of Technology Delhi, Hauz Khas, New Delhi –  
110016, India.

\*To whom correspondence should be addressed.

E-mail: sipandey@chemistry.iitd.ac.in, Phone: +91-11-26596503, Fax: +91-11-26581102

## Table of Contents

|         | Page No. |
|---------|----------|
| Fig. S1 | S3       |
| Fig. S2 | S4       |
| Fig. S3 | S5       |

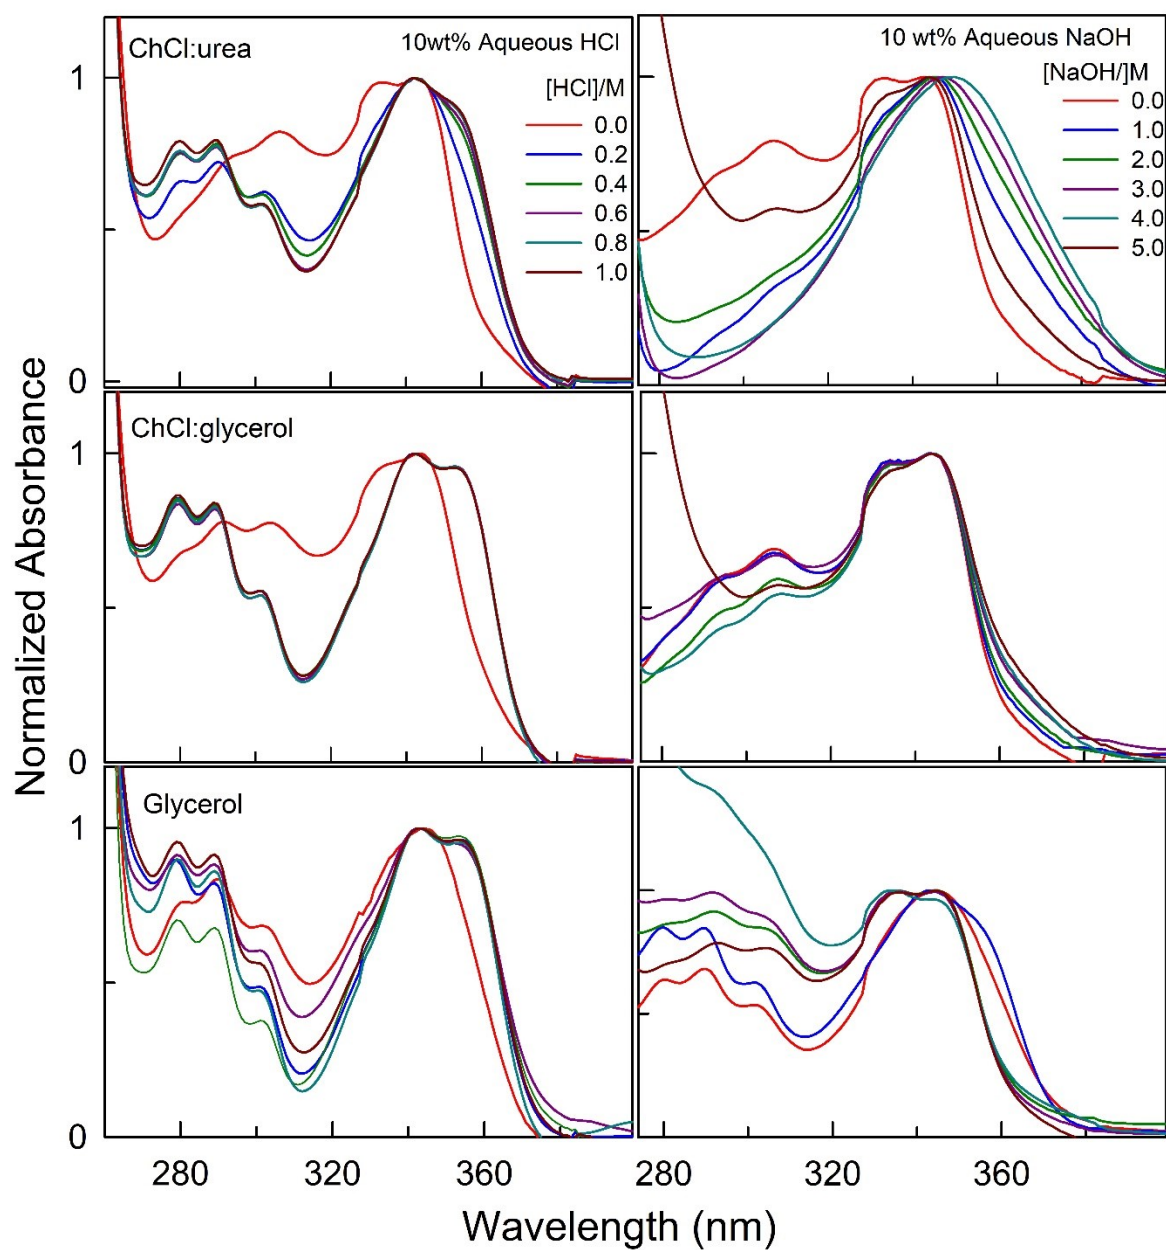

Fig. S1 Normalized absorption spectra of 1,2-HNA (25  $\mu$ M) dissolved in ChCl:urea, ChCl:glycerol and glycerol in the presence of 10 wt% aqueous HCl and aqueous NaOH with varying concentrations under ambient conditions.

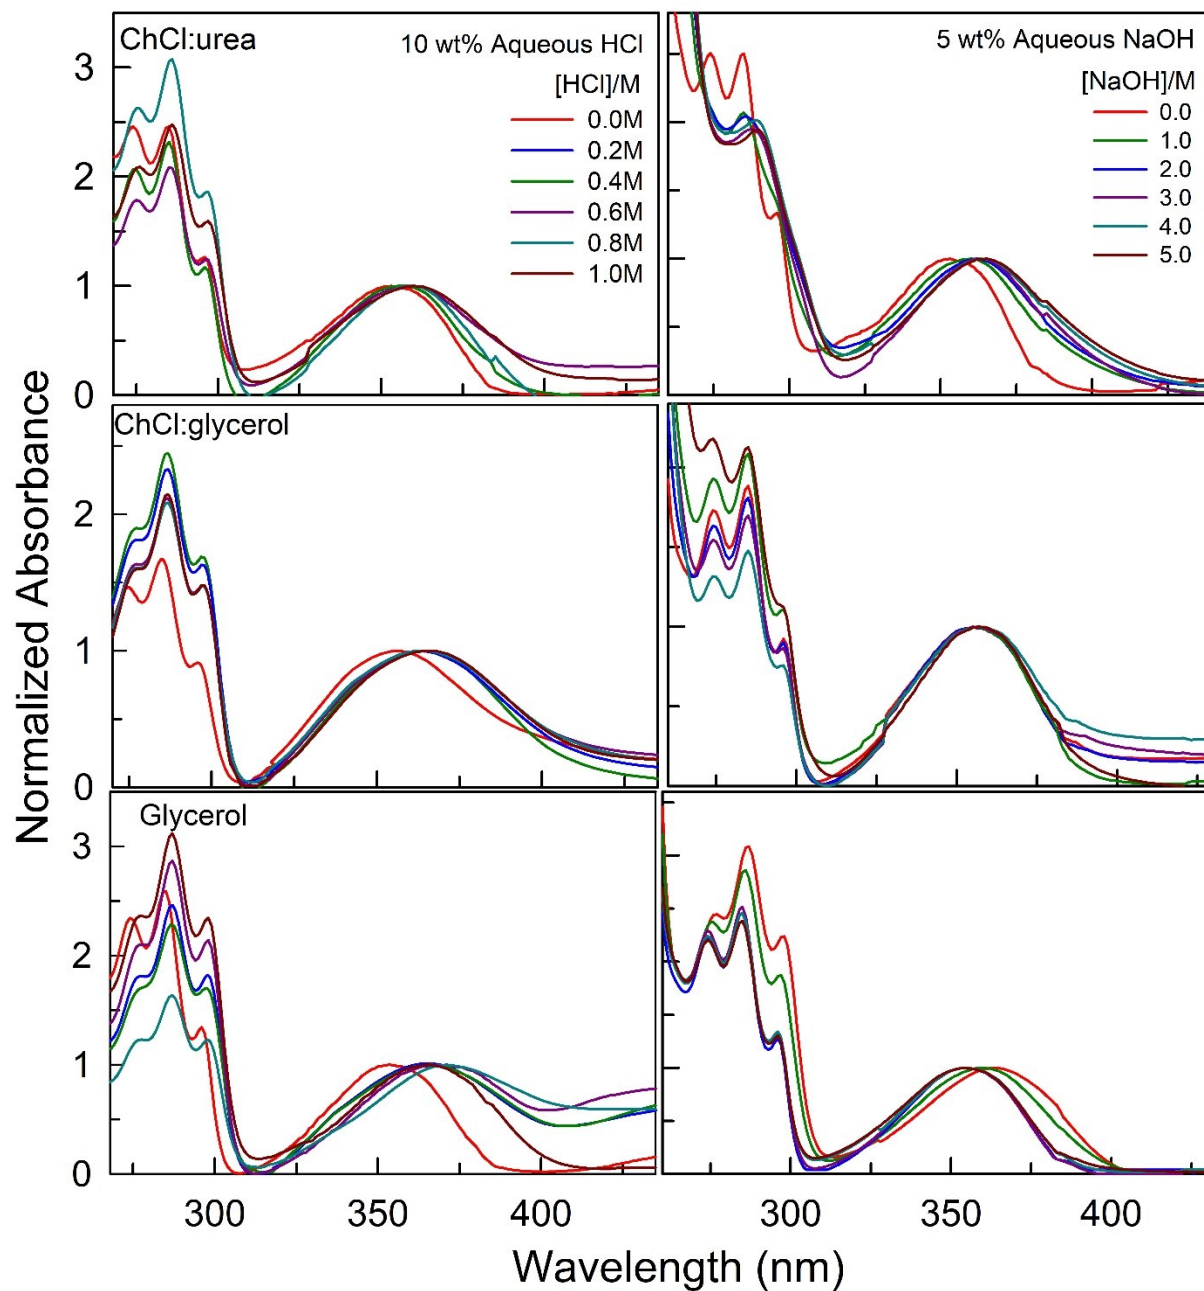

Fig. S2. Normalized absorption spectra of 3,2-HNA (25  $\mu$ M) dissolved in ChCl:urea, ChCl:glycerol and glycerol in the presence of 10 wt% aqueous HCl and 5 wt% aqueous NaOH with varying concentrations under ambient conditions.

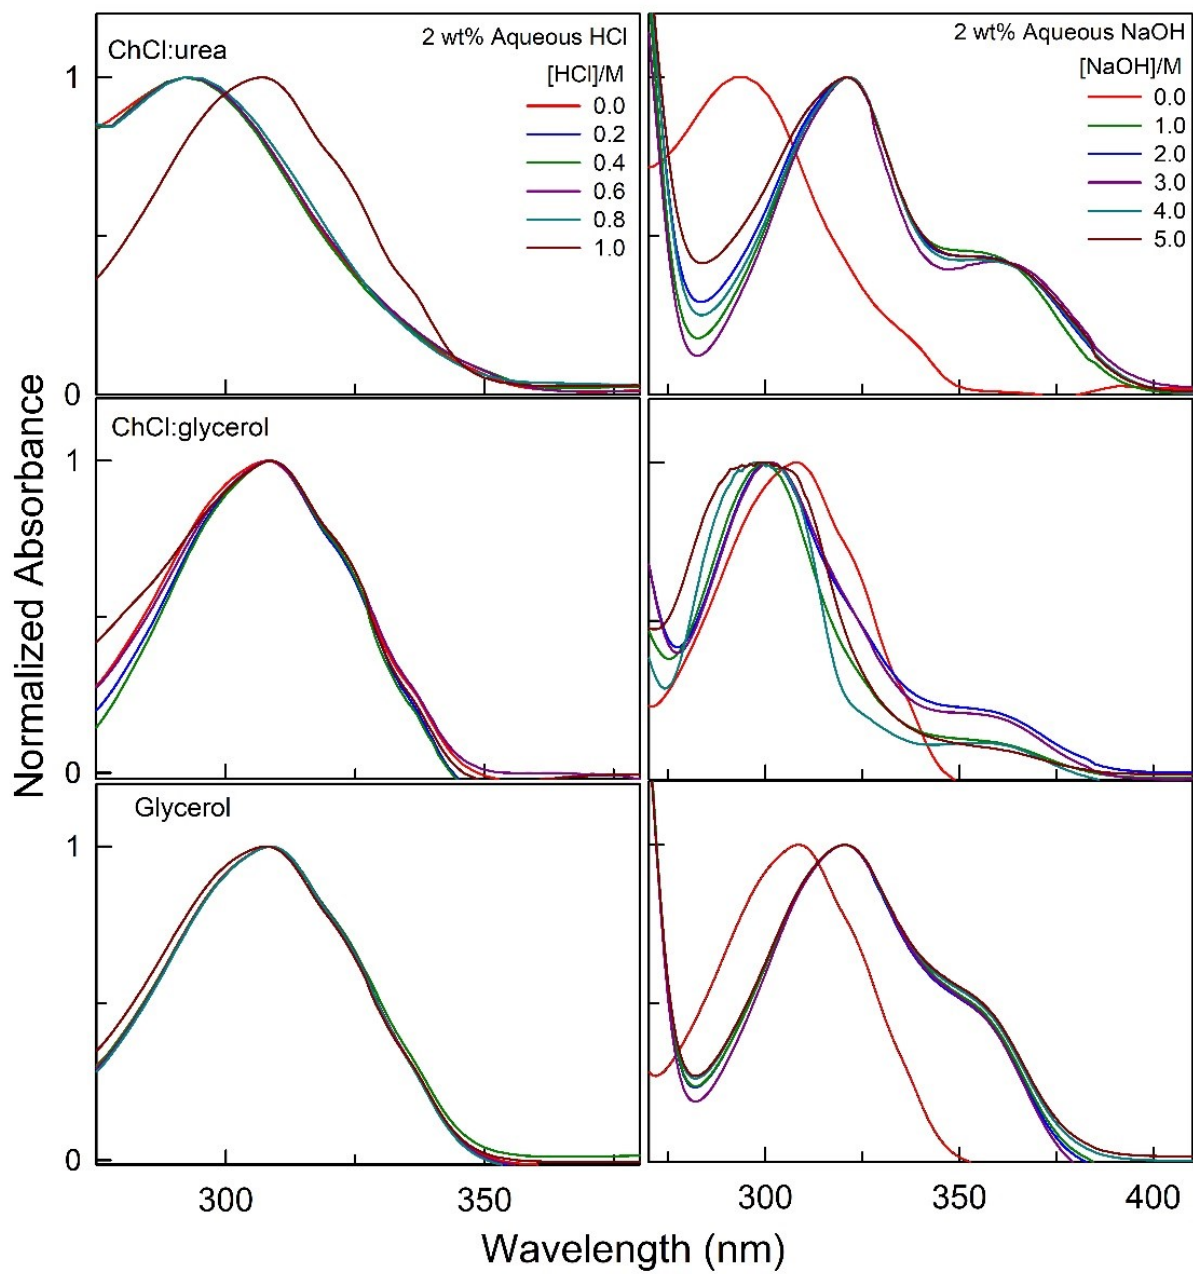

Fig. S3 Normalized absorption spectra of 6,2-HNA (25  $\mu$ M) dissolved in ChCl:urea, ChCl:glycerol and glycerol in the presence of 2 wt% aqueous HCl and aqueous NaOH with varying concentrations under ambient conditions.
